# Supplementary material for: The QBO and global-scale tropical waves in Aeolus wind observations, radiosonde data, and reanalyses
Source: Copernicus journal article supplement (doi:10.5194/egusphere-2023-408), 2023-03-30
Supplement: Supplementary file [file egusphere-2023-408-AC2-supplement.pdf]

Many thanks to Referee #2 for carefully reading the paper and for the very constructive comments that will significantly help to improve the manuscript!

Please find below our point-by-point reply to the reviewer concerns. Comments by Reviewer #2 are given in red, our reply is given in black, and changes in the manuscript are indicated in blue.

## **Reply to the Specific Comments by Reviewer # 2:**

### **(1) L36 : “one of the main ...” : What would be other processes in the tropics ?**

Other source processes could be shallow convection, or, in the case of small scale gravity waves, for example, wind shear and excitation by orography. The present study, however, is not focused on gravity waves, and even for gravity waves in the tropics source processes other than convection should be less prominent.

Therefore, in order to avoid mentioning too many details and to stay more focused, the sentence was reworded as follows:

“...with convection as the main wave generation process.”

### **(2) L43 : “... MRGWs” : It may be arguable whether the MRGW is a prominent wave mode in zonal winds, as also seen in the result of this paper.**

Traditionally, MRGWs were believed to be important. However, as indicated in this study, MRGWs seem to be much weaker than Kelvin waves. Therefore we revised the text as follows:

“... One of the most prominent wave modes in zonal winds are equatorial Kelvin waves. In zonal winds, Kelvin waves are symmetric with respect to the equator. Another wave mode are mixed Rossby-gravity waves (MRGWs). The latter are antisymmetric in zonal winds. Further, there are...”

### **(3) L48 : “in the troposphere” : Isn’t the OLR a quantity at the top of atmosphere, observed from the space ?**

Indeed, this formulation may be somewhat misleading. Here “in the troposphere” was addressing the wave distributions in the troposphere — not where the observations were made. Therefore the text was reworded as follows:

“Global observations from satellite are particularly suited for these kind of investigations: An overview of the spectral contributions of the different wave modes in the troposphere is given, for example, by Wheeler and Kiladis (1999) based on outgoing longwave radiation (OLR) observations. In the stratosphere, the spectral contributions of the different wave modes were investigated, for example, by Ern et al. (2008) using global temperature observations from space.”

### **(4) L51 : I would suggest including Bushell et al. (2022, doi:10.1002/qj.3765) too.**

reference has been added

### **(5) L61 : Could you please add a reference ?**

Three references have been added: Mote et al. (1996), Pumphrey et al. (2008), and Butchart (2014)

**(6) L52 : Holt et al. should be removed in this line (but kept in L53) as they did not analyze gravity waves but resolved waves (mainly Kelvin waves and MRGWs).**

done

**(7) L82 : “models” – > “reanalyses”**

changed as suggested

**(8) L154, 159 : “T639”, “T319” – > “TL639”, “TL319”**

changed as requested

**(9) L162 : “~21 km in the tropics”**

changed as suggested

**(10) Figures : Reference mean-wind contours : Why has MERRA-2 been chosen (while the difference of the reanalysis outputs from Aeolus winds is minimum for ERA-5) ?**

At the time of writing only JRA-55 and MERRA-2 were available until end 2022.

The ERA-5 dataset has now been updated until end of 2022. As recommended, we now use ERA-5 contour lines as a reference.

**(11) L236–237 : Would traveling waves remain in monthly mean (which is usually used for the QBO) ?**

This question addresses the point whether local radiosonde stations would be a good proxy for the QBO. Indeed, the effect of traveling waves would be much reduced in monthly averages. Still, it is unclear whether local stations can serve as a QBO proxy, and obviously this topic needs some more discussion.

Therefore we have included another figure in the manuscript that shows the zonal wind differences between all other radiosonde stations and Mia Padang as a reference. Mia Padang is selected as a reference because it is relatively close to the equator and has a good temporal coverage. We have also added the following detailed discussion in the manuscript.

Of course, there are large zonal wind differences in the troposphere that are related to the quasi-stationary wave pattern.

The new figure also shows that in the stratosphere for the three stations that are located about 5° off-equator (Bogota, Abidjan, and the Seychelles) there are persistent zonal wind differences of up to about 10 m s<sup>-1</sup> over several months. This means that the zonal wind observed at these stations would not be a good QBO proxy, and stations closer to the equator would be preferable.

However, in the stratosphere there are also considerable zonal wind differences between Mia Padang and the other stations that are located close to the equator. Partly, these differences are caused by traveling global-scale waves. This effect is most strongly seen in the differences between Belem and Mia Padang — probably because the difference in longitude between these two stations is relatively large such that zonal wavenumber 1 waves are almost in anti-phase at these two stations. As most of the traveling waves seem to have periods of 30 days, or shorter, the effect of these waves will be strongly reduced in monthly averages.

Interestingly, there are also differences between Belem and Mia Padang that persist for several months. For example, in 2019 between 18 and 25 km altitude there are differences of up

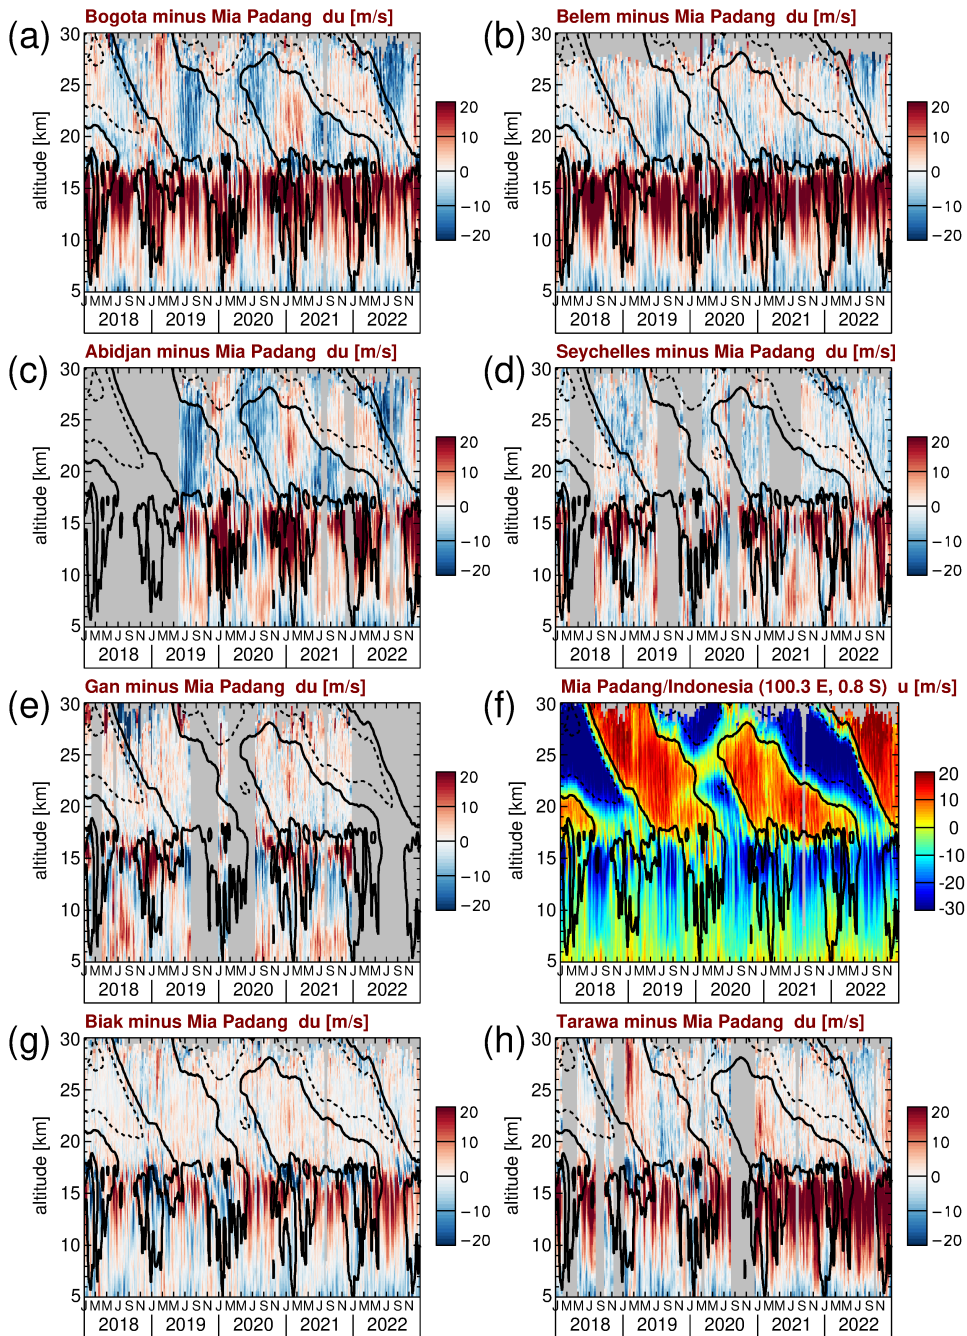

**Figure 1:** (a–e) and (g–h): Zonal wind differences between seven of the eight radiosonde stations introduced in Fig. 2 in the manuscript and the winds at Mia Padang as a reference. In panel (f) the zonal winds at Mia Padang are also given for illustration. Contour lines indicate the ERA-5 zonal mean zonal wind shown in Fig. 1a in the manuscript.

to  $-10 \text{ m s}^{-1}$  that persist for about three months. Similar negative deviations, albeit weaker, are also seen at Tarawa in the same months and the same altitude range. These deviations may therefore be related to a quasi-stationary wave. (Please note that also in former Figs. 7 and particularly Fig. 8 enhanced QSPW variances are seen in the same months and the same altitude range.) Deviations of similar magnitude and duration, but opposite sign are seen between Tarawa and Mia Padang in early 2019 at 20 to 30 km altitude, and in late 2020 to early 2021 at 18 to 23 km altitude. These differences occur even though the three

mentioned stations are all closer than  $1.5^\circ$  to the equator. This means that observations at single stations can easily be biased and shows the importance of global wind observations from satellite, such as Aeolus, in order to be able to calculate reliable zonal mean zonal winds in the stratosphere.

**(12) L250 : Aren't the intervals at 3 days ? (L188)**

for clarification, we have replaced “7-day intervals” with “7-day averaging periods”

**(13) L265 : Please provide the corresponding period here again.**

the period was added as recommended

**(14) L268 : Where is the SAO shear-related signal found in the figure ?**

The statement about the SAO has been deleted because this effect is seen only in mid 2020 at the very highest altitudes.

**(15) L269 : “drop” : what does this mean ?**

For clarification we have replaced “drop” with “amplitude reduction with altitude”

**(16) L272–274 : Could the uncertainty range of altitude estimates, derived from the temperature and pressure profiles, be calculated/provided ? Would it be as large as  $\sim 1$  km at  $z = 20\text{--}25$  km ?**

As a measure of uncertainty, for the reanalyses we have calculated at given geopotential altitudes the pressure differences between reanalysis and different radiosonde stations as a reference. These pressure differences were then converted into altitude differences using the local scale height. This has been performed for the dataset of 7-day averages calculated with a time step of three days. The characteristics found for the different radiosonde stations are very similar. Therefore we only show the differences for the Tarawa station where the zonal wind differences in former Fig. 5e–h were most prominent.

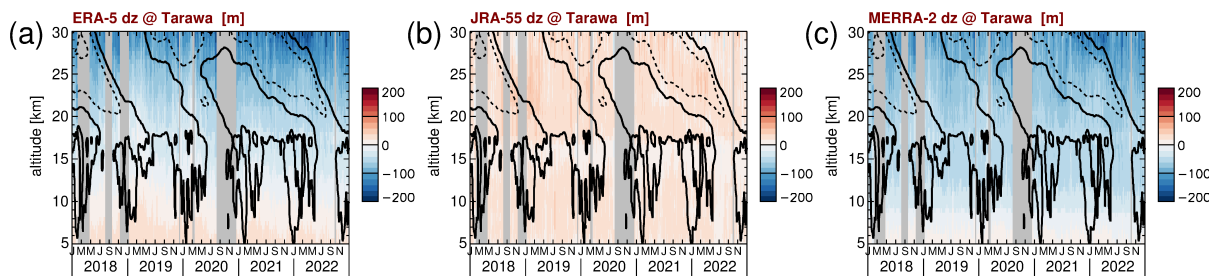

**Figure 2:** Differences in geopotential altitude between (a) ERA-5, (b) JRA-55, and (c) MERRA-2 and the radiosondes at Tarawa as a reference. Altitude differences were calculated from pressure differences at given geopotential altitudes using the local scale height. Zonal wind contour lines are from ERA-5. Contour interval is  $20 \text{ m s}^{-1}$ , westward winds are indicated by dashed contour lines, and zero wind is indicated by solid contour lines.

As can be seen from this figure, the altitude differences show a systematic pattern with only small temporal variations. Deviations are typically less than 100 m with JRA-55 showing

the smallest deviations on average (possibly because JRA-55 assimilates IGRA radiosonde data). Given typical magnitudes of QBO-related vertical gradients of the zonal wind of about  $10 \text{ m s}^{-1} \text{ km}^{-1}$  (perhaps  $20 \text{ m s}^{-1} \text{ km}^{-1}$  at maximum), this would result in typical biases of 1 to  $2 \text{ m s}^{-1}$ , which is much less than the biases seen for JRA-55. This is some evidence for systematic errors in the zonal momentum budget of JRA-55 being the dominant effect responsible for the wind biases seen in the QBO shear zones. Also for the other reanalyses errors in the zonal momentum budget will contribute to the wind differences seen in the zones of strong wind shear.

See also General Comment 1c by Reviewer # 1. We have included the new figure and the discussion about different altitude scales into a new Appendix B4, which is part of new Appendix B that addresses several potential error sources.

**(17) L279–280 : The shear-related differences found between reanalysis and radiosonde winds (e.g., positive differences along the dashed contour in the stratosphere in 2021–2022, followed by negative differences along the solid contour in 2022; seen more clearly in ERA-5 and JRA-55 than in MERRA-2) are observed at all four stations, thus it is arguable whether the cancellation effect due to zonal averaging could hide these signals. Moreover, these shear-related differences from radiosonde winds are also found in Aeolus data in 2021–2022 along the dashed and solid contours with generally the same signs: positive and negative, respectively (although a bit noisy). The fact that the shear-related differences (from the radiosonde) are rather consistently found in Aeolus and reanalyses can therefore lead to the expectation that differences between Aeolus and reanalysis winds (as in Fig. 1) regarding the shear zone would be less pronounced than the differences from the radiosonde.**

It is correct that the differences between Aeolus and radiosondes partly show a systematic pattern similar to that of the differences between reanalyses and radiosondes, but somewhat weaker. Therefore it is expected that the systematic differences between reanalyses and radiosondes seen in former Figs. 4 and 5 will not show up in Fig. 1 in the manuscript to full extent. Still, there should be some cancellation effects on zonal average.

Therefore we have reworded the text in former lines 279–281 as follows:

“The fact that differences in the shear zones are less pronounced in the zonal averages shown in Fig. 1 could partly be related to cancellation effects that occur in zonal averages. Further, in the shear zones the differences between Aeolus and the radiosondes are often similar to the differences between the reanalyses and the radiosondes, which will reduce the shear zone effect when Aeolus is taken as a reference in Fig. 1. Finally, the altitude coverage of Aeolus at altitudes above 20 km is quite limited, which means that the altitudes where these effects are strongest are not well covered in Fig. 1.”

**(18) L327 : “1 cycle/day” : How is this determined ?**

For clarification, we have added the following sentence:

“This frequency limit results from the twice-daily asynoptic satellite sampling by combining ascending and descending parts of the satellite orbit that are measured at different solar local times (e.g., Salby, 1982).”

**(19) L337–339 : That the phase shift is mentioned here leads readers to deduce the whole procedures to obtain the two spectra (while there could exist different ways) which have been omitted in the text. If the authors would mention the phase shift in the text, an explanation for the procedures before/after the shifting should also be supplemented. Or it may also be okay if the phase shift — a specific way to obtain the two spectra — is not mentioned at all, while still referring to the reference for the details.**

As suggested, the sentence mentioning the phase shift has been removed in the revised manuscript.

**(20) L363–364 : Is there any reason that the different frequency ranges are used between reanalyses and Aeolus ? Would it be more consistent if the frequencies higher than 1 cycle/day are not used in reanalyses too?**

We are limiting our study to frequencies  $<0.5$  cycles day<sup>-1</sup>, i.e., well below the Nyquist frequencies of all datasets. Therefore, the higher Nyquist frequencies of the reanalyses of 2 cycles day<sup>-1</sup> compared to  $\sim 1$  cycle day<sup>-1</sup> for Aeolus should not be relevant.

**(21) L417 : What would be a possible reason that the reanalyses could not capture this? (ENSO-related phenomena must be in large scales in space and time.)**

ENSO as a possible explanation was given just as a speculation, and it was clearly mentioned that further investigation was needed.

Still, there is some justification for our speculation:

It is correct that ENSO-related phenomena are large scale in space and time. However, the circulation shifts of the Pacific Walker circulation occur in a region (the Pacific) where wind observations are relatively sparse! This means that the reanalyses are less well constrained in this region, which is indicated by the relatively poor performance of the reanalyses (even of ERA-5) at the location of Tarawa where the circulation shift becomes most obvious.

Therefore adding ENSO as a possible explanation and clearly marking this as a speculation seems to be justified.

We have reworded our statement in former L417, added some explanation, and emphasized more clearly that our explanation is very speculative:

“Possibly, the reanalyses are not fully capturing this circulation shift because in the Pacific region, where this circulation shift happens, there are only few observations from radiosondes that can be assimilated in the reanalyses. Consequently, reanalyses might be less reliable in the Pacific region. Still, our data record is far too short to be able to reliably attribute the larger deviations in Fig. 8b, d, and f to ENSO-related phenomena, and our suggested explanation remains very speculative.”

**(22) L464–465 : Regarding the underrepresentation of MRGWs in JRA-55, Kim et al. (2019, doi:10.5194/acp-19-10027-2019) could also be added here (in which the meridional winds are used for MRGWs).**

Reference has been added as recommended.

**(23) Fig. 10 : It is interesting to observe the MRGW peak above the easterly, around January 2022 ( $z \sim 30$  km). Would there be no statement to mention about this ?**

The following explanation has been added in the revised manuscript:

“Further, it should be mentioned that enhanced variances at high altitudes are not necessarily due to equatorial MRGWs, but could also be caused by extratropical Rossby waves propagating equatorward from the winter hemisphere. In particular, enhanced variances around 30 km in January 2022 are suspicious because this variance peak is observed above a QBO westward phase where MRGWs propagating from below could have been filtered out.”

**(24) L471 : “are similar (about 10–15 m<sup>2</sup> s<sup>-2</sup>)”**

changed as recommended

**(25) L484 : “n=0 inertia gravity waves” (with no parenthesis)**

changed as recommended

**(26) L546 : The La Nina condition may be a possible factor for the less performance seen in 2021–2022. Could you please revise the sentence to be a bit less conclusive ? (The 5-year record is too short to generalize this finding.)**

We have revised the sentence to clearly mark our explanation as very speculative:

“Further, deviations for the quasi-stationary waves seem to be somewhat larger in the years 2021 and 2022. We speculated that this might be related to the circulation shift by La Niña conditions in these years. However, our data record is far too short to allow more than a vague speculation, and more detailed investigations would be needed.”

**(27) Appendix A1 : “Rossby-wave-like”, “gravity-wave-like” : I would suggest using a less ambiguous term.**

In the original work by Matsuno (1966) the term “Rossby wave type” was used for the equatorial Rossby wave solutions. Therefore we will use this term in the revised manuscript, referring to Matsuno (1966). For the other wave modes (Kelvin waves, IGWs, and MRGWs) we will use the term “other wave modes” because this class of wave modes includes the MRGWs which are a mixture of the “Rossby wave type” and the “inertio-gravity wave type” modes that were introduced by Matsuno (1966). Still, it is correct that these “other wave modes” have at least some properties of inertia-gravity waves.

**(28) L582 : Could you please explain this a bit more ? (I could not understand it.)**

For clarification, we have added the following explanation:

“This means that wind amplitudes and temperature amplitudes of Rossby waves maximize for different conditions. If at a given altitude the geopotential perturbation due to a Rossby wave maximizes, the corresponding strong horizontal geopotential gradients will likely also lead to a maximum of the wind perturbation. Different from this, at the altitude of the maximum geopotential perturbation, the vertical gradient of the geopotential perturbation will be zero. Consequently, the temperature perturbation will be small.”

**(29) L591 : The stability change around the tropopause also leads to the decrease in the vertical wavelength which then could result in the change in the zonal wind amplitudes. Would it be justified to consider the constant wind amplitude here ?**

For clarification, we have added the following explanation in the revised manuscript:

Of course, the assumption of a constant wind amplitude is somewhat arbitrary and was just made to facilitate the explanation of the temperature amplitude jump at the tropopause. As can be seen from former Fig. 9, the zonal wind variances of Kelvin waves reduce by a factor of about 4 between the upper troposphere and the lower stratosphere, which means a reduction of the Kelvin wave zonal wind amplitudes by a factor of about two. Accordingly, a reduction in temperature amplitudes by the same factor would be expected assuming a constant buoyancy frequency. However, as can be seen from Fig. A1d-f, we observe even the opposite effect: temperature amplitudes increase by a factor of about two between the upper troposphere and the lower stratosphere, which underlines the importance of the effect of changes in the buoyancy frequency at the tropopause.



## Reply to the Technical Comments by Reviewer # 2:

**(1) L32 : “sensitive” : (to what ?) not clear what this means**

“very sensitive” has been deleted

**(2) L40 : “These” → “The”**

done

**(3) L68 : “observation” : repetitive**

second occurrence has been removed

**(4) L84 : “tropical” : repetitive**

first occurrence has been removed

**(5) L88 : “mean zonal wind” (to distinguish from what is investigated in Sect. 4)**

changed as recommended

**(6) L115 : “and neglecting” → “neglecting” ?**

changed as recommended

**(7) L161 : “pressures below” → “pressures less than”**

done

**(8) Fig. 1 caption : (1) The period “2018-2022” is applied not only for the mean but also for the standard deviation. Please rephrase the sentence. (2) Currently what the standard deviation is of is not specified (which must be of the difference). Please rephrase it. (3) Black solid and dashed lines : What are the corresponding values ? (0 and -20 m/s ?)**

Caption of Fig. 1 has been revised.

**(9) Fig. 1 : Could the late months in 2022 in ERA-5 now be filled ?**

The ERA-5 dataset has been extended until end of 2022. Further, the zonal wind contour lines are now from ERA-5 as was recommended in Specific Comment (10).

**(10) L207 : comma → period**

done

**(11) L288–289 : Please re-write “This ... stations” to, e.g., “The magnitude of this pattern differs among the stations.”**

Thank you very much for this improved formulation! Changed as recommended.

**(12) L293 : “differences” → “errors” ? (such advection or wave forcing cannot be derived from sonde data, and thus the comparison/difference cannot be made.)**

replaced as recommended

**(13) L296 : “shear, deficiencies” (comma)**

done

**(14) Fig. 6 caption : (1) Is it actually the “squared spectral amplitudes”, not the spectral variances ? (2) Would it be clearer if  $n = 1$  (sym.) and  $n = 2$  (antisym.) were indicated for Rossby waves, to distinguish from  $n > 2$  modes ? (Or, could the term “equatorial” Rossby waves already imply those ?)**

(1) Squared spectral amplitudes is correct. A factor of 0.5 has to be applied after integrating in the spectral domain over the squared spectral amplitudes for obtaining variances as shown later in Sect. 4.2. This was already stated at the beginning of Sect. 4.2.1 where an example was given for the symmetric QSPW1. This example showed that the QSPW1 amplitude determined from the spectra is in good agreement with the QSPW1 amplitude that can be estimated from the radiosondes.

(2) Strictly speaking, also higher modes of equatorial Rossby waves could occur in the atmosphere — for example,  $n=3$  symmetric, or  $n=4$  antisymmetric modes, or even higher-order modes. These higher-order modes, however, should be of smaller amplitude. Higher-order modes differ from lower-order modes by their meridional structure, but cannot be distinguished from the lower-order modes in the latitudinally averaged spectra presented in former Fig. 6: the equatorial Rossby wave contributions in former Fig. 6 are the sum of all symmetric and antisymmetric equatorial Rossby waves, respectively, irrespective of their order. This means that using the general terms “symmetric equatorial Rossby waves” and “antisymmetric equatorial Rossby waves” is correct as is.

However, we now note in the figure caption that the equatorial Rossby wave dispersion lines are plotted for the  $n=1$  and  $n=2$  modes only, and a short explanation is given in the text of the revised manuscript.

**(15) L358 : “In addition” → “Here” ; “... avoided in the calculation of the background”**  
changed as suggested

**(16) L373–374 : I could not understand this sentence.**

This sentence has been rewritten by adding some more explanation. It now reads:

“As the variance of a sine wave averaged over a full period is 0.5 times the squared amplitude of the wave, the peak variances seen in Fig. 7a, c, e, and g correspond to a 15°S–15°N and 31-day average amplitude of square-root two times the variance, i.e., the square-root of  $300 \text{ m}^2 \text{ s}^{-2}$ , which is about  $17 \text{ m s}^{-1}$ .”

**(17) L428–433 : Too many “Again” (4 out of 6 sentences in the paragraph begin with this.)**

Three out of four “again” have been replaced, or deleted.

**(18) L496 : “initiatives” : plural or singular ?**

As both cited references are from the same initiative we are using singular now.

**(19) L580 : “z” in the equation may also need to be defined (log-pressure altitude).**

Definition of  $z$  has been added.

**(20) L585 : “gravity-wave-like Kelvin” → “Kelvin”**

changed as suggested

**(21) Please remove commas ahead of ‘and’ in, e.g., L20, 29, 345.**

done

**(22) Please remove commas ahead of 'or' in, e.g., L41, 45, 312.**

done

## References

Bushell, A. C., Anstey, J. A., Butchart, N., Kawatani, Y., Osprey, S. M., Richter, J. H., Serva, F., Braesicke, P., Cagnazzo, C., Chen, C.-C., Chun, H.-Y., Garcia, R. R., Gray, L. J., Hamilton, K., Kerzenmacher, T., Kim, Y.-H., Lott, F., McLandress, C., Naoe, H., Scinocca, J., Smith, A. K., Stockdale, T. N., Versick, S., Watanabe, S., Yoshida, K., and Yukimoto, S.: Evaluation of the Quasi-Biennial Oscillation in global climate models for the SPARC QBO-initiative, *Q. J. Roy. Meteor. Soc.*, 148, 1459–1489, <https://doi.org/10.1002/qj.3765>, 2022.

Butchart, N.: The Brewer-Dobson circulation, *Rev. Geophys.*, 52, 157–184, [doi:10.1002/2013RG000448](https://doi.org/10.1002/2013RG000448), 2014.

Matsuno, T.: Quasi-geostrophic motions in the equatorial area, *J. Meteorol. Soc. Jpn.*, 44, 25–43, 1966.

Mote, P. W., Rosenlof, K. H., McIntyre, M. E., Carr, E. S., Gille, J. C., Holton, J. R., Kinnnersley, J. S., Pumphrey, H. C., Russell III, J. M., and Waters, J. W.: An atmospheric tape recorder: The imprint of tropical tropopause temperatures on stratospheric water vapor, *J. Geophys. Res.*, 101, 3989–4006, [doi:10.1029/95JD03422](https://doi.org/10.1029/95JD03422), 1996.

Pumphrey, H. C., Boone, C., Walker, K. A., Bernath, P., and Livesey, N. J.: Tropical tape recorder observed in HCN, *Geophys. Res. Lett.*, 35, L05801, [doi:10.1029/2007GL032137](https://doi.org/10.1029/2007GL032137), 2008.

Salby, M. L.: Sampling theory for asynoptic satellite observations, Part I: Space-time spectra, resolution, and aliasing, *J. Atmos. Sci.*, 39, 2577–2600, 1982.
